# Optimal cumulative cisplatin dose in nasopharyngeal carcinoma patients based on plasma Epstein–Barr virus DNA level after induction chemotherapy

Sai-Lan Liu<sup>1,2,\*</sup>, Xue-Song Sun<sup>1,2,\*</sup>, Li-Ting Liu<sup>1,2,\*</sup>, Rui Sun<sup>1,2</sup>, Dong-Hua Luo<sup>1,2</sup>, Qiu-Yan Chen<sup>1,2</sup>, Huan-Xin Lin<sup>1,3</sup>, Li Yuan<sup>1,2</sup>, Lin-Quan Tang<sup>1,2,#</sup>, Ling Guo<sup>1,2,#</sup>, Hai-Qiang Mai<sup>1,2,#</sup>

<sup>1</sup>Sun Yat-Sen University Cancer Center, State Key Laboratory of Oncology in South China, Collaborative Innovation Center for Cancer Medicine, Guangzhou, Guangdong Province, People's Republic of China

<sup>2</sup>Department of Nasopharyngeal Carcinoma, Sun Yat-Sen University Cancer Center, Guangzhou, Guangdong Province, People's Republic of China

<sup>3</sup>Department of Radiotherapy, Sun Yat-Sen University Cancer Center, Guangzhou, Guangdong Province, People's Republic of China

\*Equal contribution and Co-first authors

#Co-senior authors

**Correspondence to:** Hai-Qiang Mai; email: [maihq@sysucc.org.cn](mailto:maihq@sysucc.org.cn)

**Keywords:** nasopharyngeal carcinoma, induction chemotherapy, EBV DNA, cumulative cisplatin dose

**Received:** November 26, 2019

**Accepted:** March 3, 2020

**Published:** March 27, 2020

**Copyright:** Liu et al. This is an open-access article distributed under the terms of the Creative Commons Attribution License (CC BY 3.0), which permits unrestricted use, distribution, and reproduction in any medium, provided the original author and source are credited.

## ABSTRACT

**Purpose:** This study aimed to elucidate the optimal cumulative cisplatin dose (CCD) for concurrent chemoradiotherapy (CCRT) according to the post-induction chemotherapy (IC) plasma Epstein–Barr virus (EBV) DNA level.

**Results:** EBV DNA was detected and undetected in 179 and 370 patients, respectively. Of the entire cohort, 73/549 (13.3%) patients received a total CCD  $\geq 160$  mg/m<sup>2</sup> and 476/549 (86.7%) patients,  $<160$  mg/m<sup>2</sup>. CCD enhancement was not associated with a survival benefit in patients with undetected EBV DNA after IC. However, among patients with post-IC detectable EBV DNA, higher 3-year PFS and locoregional relapse-free survival (LRFS) rates were observed in those who received a CCD  $\geq 160$  mg/m<sup>2</sup>. Multivariate analysis also showed CCD was an independent prognostic factor for PFS and LRFS in patients with post-IC detectable EBV DNA.

**Conclusions:** CCD enhancement was not associated with a survival benefit in patients with undetected EBV DNA after IC. However, among patients with post-IC detectable EBV DNA, those receiving  $\geq 160$  mg/m<sup>2</sup> CCD showed significantly improved 3-year PFS and LRFS.

**Methods:** NPC patients (549) treated with IC and CCRT were included. Prognosis was assessed using a multivariate Cox proportional hazards model. Furthermore, grade 1–4 toxicities were compared between different CCD groups.

## INTRODUCTION

Nasopharyngeal carcinoma (NPC) is an endemic malignancy prevailing in Southern China and Southeast China [1, 2]. It is very strongly associated with Epstein–Barr virus (EBV) infection, with plasma EBV DNA

being detectable in approximately 90% of cases [3]. Radiotherapy with concurrent cisplatin-based chemotherapy is the standard treatment regime for locoregionally advanced NPC [4–6]. Recently, several randomized controlled trials demonstrated induction chemotherapy (IC) prior to concurrent chemotherapy

(CCRT) could afford a survival benefit for NPC patients in the era of intensity-modulated radiation therapy (IMRT) [7–9]. However, 20–30% of patients still show locoregional or distant relapse [10]. Hence, identifying patients with different risks of treatment failure and providing evidence for the need of individualized therapy are urgent.

Previous studies have reported that plasma EBV DNA levels after IC are closely correlated with the survival outcome of NPC patients and could be used to stratify patients in different risk groups [11, 12]. Patients with detectable EBV DNA level after IC are at a high risk of treatment failure and need intensive treatment. In contrast, in patients with undetectable EBV DNA level after IC, treatment intensity could be reduced to avoid unnecessary toxicities.

In terms of concurrent chemotherapy dosage, cisplatin-based regimens can be delivered at 30–40 mg/m<sup>2</sup> per week or as one administration of 80–100 mg/m<sup>2</sup> every 3 weeks [13, 14]. Optimal concurrent chemotherapy dosage administration is important in daily clinical practice. In this study, we aimed to investigate the prognostic value of cumulative cisplatin dose (CCD) in patients who underwent IC plus CCRT using IMRT. Furthermore, a subgroup analysis was conducted to compare the therapeutic value of CCD in patients in different risk groups. Our findings will help guide treatment strategies and modification of the CCRT regimen.

## RESULTS

From January 2009 to December 2017, a total of 549 NPC patients who underwent IC plus CCRT using IMRT were involved in the study. The median patient age was 43 years (range 8–77); 419 patients were male and 130 were female. Among them, 338 patients (61.6%) received TPF IC regimen, 145 patients (26.4%) received PF, and 66 patients (12.0%) received TP. After IC, EBV levels were undetectable and detectable in 370 patients (67.4%) and 179 patients (32.6%), respectively. Table 1 lists the characteristics of the 549 patients grouped by EBV DNA level after IC. Patients with advanced N stage, clinical stage, and higher pre-EBV DNA level were significantly inclined to have detectable EBV DNA levels after IC. There were no significant differences in other clinical characteristics between the two groups.

### Relationship between EBV DNA level after IC and clinical outcome

The 3-year PFS of patients with a detectable EBV DNA level after IC was significantly worse than that of patients with undetectable EBV DNA level (74.5, 95%

confidence interval [CI]: 67.4–81.6% versus 85.0, 95% CI: 81.1–88.9%,  $P = 0.001$ ) (Figure 1A). The same trend was found in terms of OS and DMFS (3-year OS: 92.6% vs. 97.1%,  $P = 0.002$ ; 3-year DMFS: 81.1% vs. 91.2%,  $P = 0.005$ ) (Figure 1B, 1C). The 3-year LRFS did not significantly differ between these two groups: 91.8% (95% CI 87.3%–96.3%) versus 93.0% (95% CI 90.3%–95.7%,  $P = 0.496$ ) (Figure 1D). In the multivariate analysis, the levels of EBV DNA after IC were significantly associated with PFS (HR: 1.738, 95% CI: 1.173–2.576,  $P = 0.006$ ), OS (HR: 1.482, 95% CI: 0.762–2.881,  $P = 0.008$ ), and DMFS (HR: 1.891, 95% CI: 1.147–3.118,  $P = 0.013$ ) (Table 2).

### Relationship between CCD and clinical outcome

When a different CCD was considered as a prognostic factor, we found that patients who received a higher total CCD ( $\geq 160$ ) achieved a higher 3-year LRFS (93.4% vs. 87.3%) in comparison with those who received a lower total CCD. However, there were no significant differences in the other three clinical endpoints (Supplementary Figure 1). Multivariate analysis also demonstrated that a higher CCD predicted a better 3-year LRFS rate than a lower CCD (HR 0.456, 95% CI 0.222–0.939,  $P = 0.033$ ).

### The efficacy of CCD in patients with different EBV DNA levels after IC

Since patients with detectable or undetectable EBV DNA after IC showed different tumor burdens and clinical prognoses, we further explored the efficacy of CCD in patients with different EBV DNA levels after IC. Interestingly, we found that CCD played different roles in relation to its efficacy in these two subgroups. In patients with detectable EBV DNA, higher CCD was significantly correlated with a higher 3-year OS rate and LRFS (3-year PFS: 76.4% vs. 56.8%,  $P = 0.028$ ; 3-year LRFS: 94.1% vs. 78.6%,  $P = 0.020$ ) (Figure 2). In multivariate analysis, Table 3 showed that CCD remained an independent prognostic factor for PFS (HR 0.497, 95% CI 0.250–0.988,  $P = 0.046$ ) and LRFS (HR 0.325, 95% CI 0.106–0.993,  $P = 0.049$ ). However, a higher CCD did not yield significant survival benefits for patients with undetectable EBV DNA levels after IC. The Kaplan–Meier survival curves are shown in Figure 3.

### Acute toxicity

We then evaluated the acute toxicity associated with different CCDs. The number of patients with grade 1, 2, 3, and 4 toxicities is shown in Supplementary Table 1. Intergroup differences in hematological toxicities such as leukocytopenia (83.6% vs. 86.6%), neutropenia (82.2% vs. 69.4%), anemia (78.1% vs. 83.2%), and

**Table 1. Patient demographics and clinical characteristics.**

| Characteristic           | Undetectable EBV DNA (n = 370) |            | Detectable EBV DNA (n = 179) |         | P value             |
|--------------------------|--------------------------------|------------|------------------------------|---------|---------------------|
|                          | No. (%)                        | No. (%)    | No. (%)                      | No. (%) |                     |
| <b>Age, years</b>        |                                |            |                              |         | 0.572 <sup>#</sup>  |
| Median (range)           | 43(8-77)                       | 43(13-77)  | 44(8-74)                     |         |                     |
| < 45                     | 288(52.5)                      | 191(51.6)  | 97(54.2)                     |         |                     |
| ≥45                      | 261(47.5)                      | 179(48.4)  | 82(45.8)                     |         |                     |
| <b>Sex</b>               |                                |            |                              |         | 0.934 <sup>#</sup>  |
| Female                   | 130(23.7)                      | 88(23.8)   | 42(23.5)                     |         |                     |
| Male                     | 419(76.3)                      | 282(76.2)  | 137(76.5)                    |         |                     |
| <b>Pathological type</b> |                                |            |                              |         | 0.329 <sup>\$</sup> |
| WHO type I               | 2(0.4)                         | 2(0.5)     | 0(0.0)                       |         |                     |
| WHO type II              | 3(0.5)                         | 1(0.3)     | 2(1.1)                       |         |                     |
| WHO type III             | 544(99.1)                      | 367(99.2)  | 177(98.9)                    |         |                     |
| <b>T stage*</b>          |                                |            |                              |         | 0.293 <sup>#</sup>  |
| T1                       | 9(1.6)                         | 6(1.6)     | 3(1.7)                       |         |                     |
| T2                       | 65(11.8)                       | 37(10.0)   | 28(15.6)                     |         |                     |
| T3                       | 251(45.7)                      | 172(46.5)  | 79(44.1)                     |         |                     |
| T4                       | 224(40.8)                      | 155(41.9)  | 69(38.5)                     |         |                     |
| <b>N stage*</b>          |                                |            |                              |         | 0.022 <sup>#</sup>  |
| N0                       | 20(3.6)                        | 15(4.1)    | 5(2.8)                       |         |                     |
| N1                       | 134(25.6)                      | 95(25.7)   | 39(21.8)                     |         |                     |
| N2                       | 267(48.6)                      | 188(50.8)  | 79(44.1)                     |         |                     |
| N3                       | 128(23.3)                      | 72(19.5)   | 56(31.3)                     |         |                     |
| <b>Clinical stage*</b>   |                                |            |                              |         | 0.024 <sup>#</sup>  |
| II                       | 7(2.1)                         | 5(1.4)     | 2(1.1)                       |         |                     |
| III                      | 227(41.3)                      | 161(43.5)  | 66(36.9)                     |         |                     |
| IVa                      | 187(34.1)                      | 132(35.7)  | 55(30.7)                     |         |                     |
| IVb                      | 128(23.3)                      | 72 (19.5)  | 56(31.3)                     |         |                     |
| <b>EBV DNA</b>           |                                |            |                              |         | 0.029 <sup>#</sup>  |
| <4000                    | 273(49.7)                      | 196 (53.0) | 77(43.0)                     |         |                     |
| ≥4000                    | 276(50.3)                      | 174 (47.0) | 102(57.0)                    |         |                     |
| <b>IC regimen</b>        |                                |            |                              |         | 0.767 <sup>#</sup>  |
| TPF                      | 338(61.6)                      | 226(61.1)  | 112(62.6)                    |         |                     |
| PF                       | 145(26.4)                      | 101(27.3)  | 44(24.6)                     |         |                     |
| TP                       | 66(12.0)                       | 43(11.6)   | 23 (12.8)                    |         |                     |
| <b>Cisplatin regimen</b> |                                |            |                              |         | 0.898 <sup>#</sup>  |
| 3 weekly                 | 477(86.9)                      | 321(86.8)  | 156(87.2)                    |         |                     |
| Weekly                   | 72(13.1)                       | 49(13.2)   | 23(12.8)                     |         |                     |

CCD (mg/m<sup>2</sup>)

0.163<sup>#</sup>

|                |             |             |             |
|----------------|-------------|-------------|-------------|
| Median (range) | 160(40-300) | 160(40-300) | 160(40-300) |
| <160           | 73(13.3)    | 44(11.9)    | 29(16.2)    |
| ≥160           | 476(86.7)   | 326(88.1)   | 150(83.8)   |

Abbreviations: IC = induction chemotherapy; TPF = taxanes plus cisplatin with fluorouracil; PF = cisplatin with fluorouracil; TP = taxanes with cisplatin; EBV, Epstein–Barr virus; CCD = cumulative cisplatin dose during radiotherapy.

<sup>#</sup>P values were calculated by the Chi-square test. <sup>5</sup>P value was calculated with Fisher’s exact test.

\*According to the 7th edition of the UICC/AJCC staging system.

thrombocytopenia (24.7% vs. 23.9%) were not significant ( $P > 0.05$  for all comparisons; Supplementary Table 1). In addition, patients with different CCDs showed similar levels of hepatotoxicity [ALT increase (16.5% vs. 26.6%) and AST increase (12.3% vs. 9.0%)]. However, a higher incidence of grade 1-4 nephrotoxicity was observed in the group with  $CCD \geq 160$  (28.8% vs. 43.0%;  $P = 0.021$ ).

## DISCUSSION

Our study revealed that detectable EBV DNA levels after IC were associated with significantly improved PFS, OS, and DMFS in NPC patients. In the subgroup of patients with detectable EBV DNA levels after IC, patients receiving a total  $CCD < 160$  mg/m<sup>2</sup> showed significantly decreased 3-year PFS and LRFS in

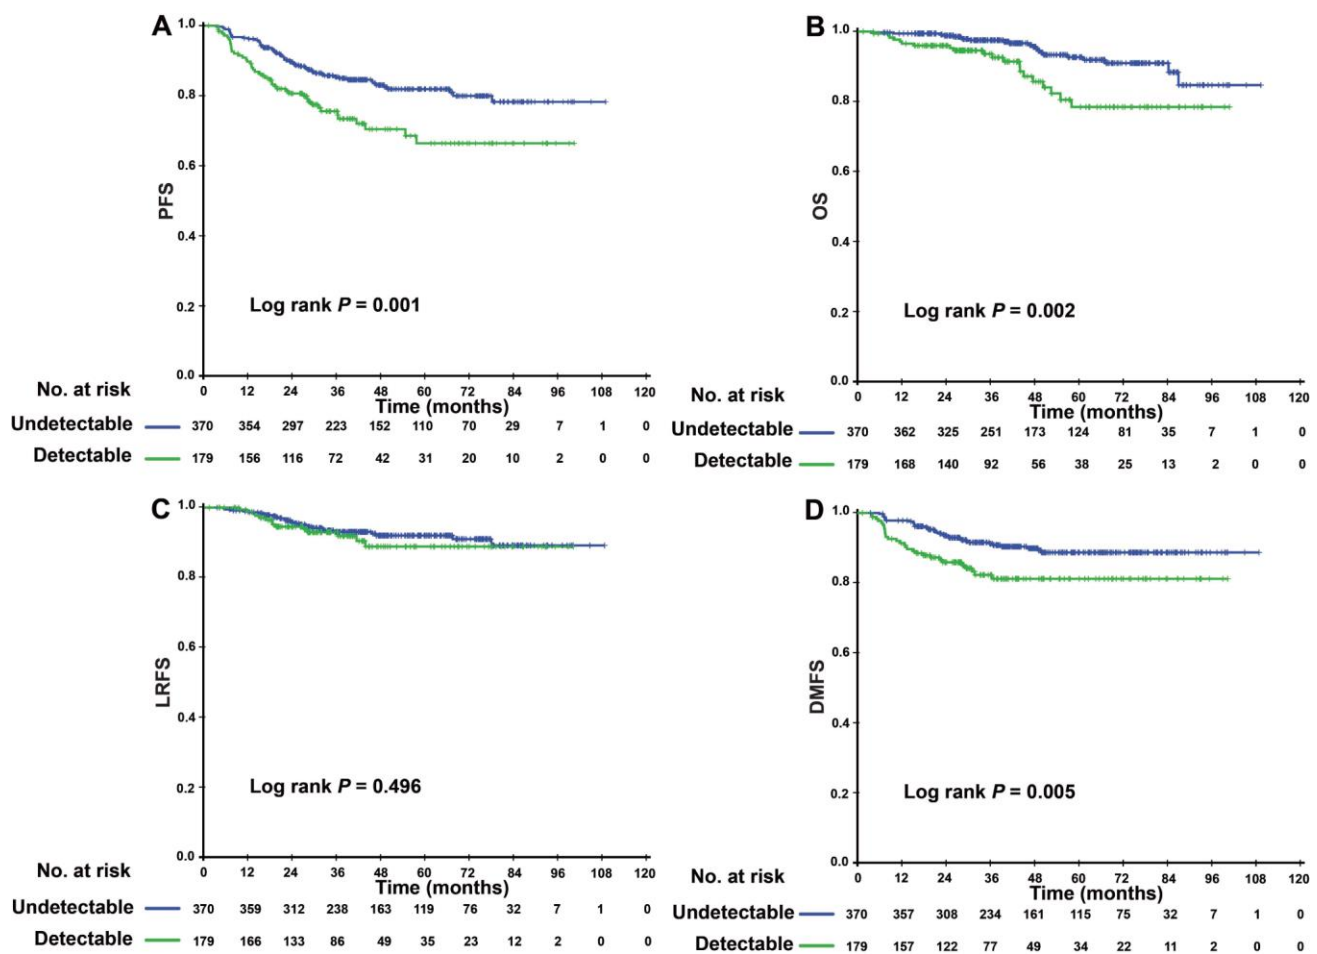

**Figure 1.** Kaplan–Meier PFS (A), LRFS (B), OS (C) and DMFS (D) curves for 549 patients with NPC with undetectable/detectable EBV DNA level after induction chemotherapy. Abbreviations: PFS = progression-free survival; OS = overall survival; LRFS = local-regional relapse-free survival; DMFS = distant metastasis-free survival; NPC, nasopharyngeal carcinoma; and EBV= Epstein–Barr virus.

**Table 2. Multivariate analysis of prognostic factors for 549 NPC patients receiving induction chemotherapy.**

|                                           | Hazard ratio* (95% CI) | P value |
|-------------------------------------------|------------------------|---------|
| <b>Progression-free survival</b>          |                        |         |
| Age (y) ( $\geq 45$ vs. $< 45$ )          | 0.739(0.496-1.102)     | 0.138   |
| Gender (F vs. M)                          | 1.111(0.704-1.753)     | 0.652   |
| T category (3-4 vs. 1-2)                  | 1.251(0.694-2.288)     | 0.456   |
| N category (2-3 vs. 0-1)                  | 0.814(0.529-1.253)     | 0.350   |
| Overall stage (IVa-b vs. II-III)          | 1.001(0.671-1.496)     | 0.994   |
| EBV DNA ( $\geq 4000$ vs. $< 4000$ )      | 2.053(1.341-3.144)     | 0.001   |
| EBV DNA ( $> 0$ vs. 0)                    | 1.738(1.173-2.576)     | 0.006   |
| CCD ( $\geq 160$ vs. $< 160$ )            | 0.699(0.419-1.164)     | 0.169   |
| <b>Overall survival</b>                   |                        |         |
| Age (y) ( $\geq 45$ vs. $< 45$ )          | 1.466(0.781-2.752)     | 0.233   |
| Gender (F vs. M)                          | 0.997(0.484-2.054)     | 0.994   |
| T category (3-4 vs. 1-2)                  | 1.046(0.389-2.810)     | 0.929   |
| N category (2-3 vs. 0-1)                  | 0.643(0.335-1.234)     | 0.184   |
| Overall stage (IVa-b vs. II-III)          | 1.657(0.843-3.256)     | 0.143   |
| EBV DNA ( $\geq 4000$ vs. $< 4000$ )      | 1.482(0.762-2.881)     | 0.246   |
| EBV DNA ( $> 0$ vs. 0)                    | 2.345(1.252-4.393)     | 0.008   |
| CCD ( $\geq 160$ vs. $< 160$ )            | 0.962(0.401-2.308)     | 0.930   |
| <b>Locoregional relapse-free survival</b> |                        |         |
| Age (y) ( $\geq 45$ vs. $< 45$ )          | 0.706(0.370-1.346)     | 0.290   |
| Gender (F vs. M)                          | 1.191(0.577-2.459)     | 0.637   |
| T category (3-4 vs. 1-2)                  | 2.071(0.615-6.972)     | 0.240   |
| N category (2-3 vs. 0-1)                  | 0.522(0.272-1.002)     | 0.051   |
| Overall stage (IVa-b vs. II-III)          | 0.931(0.493-1.758)     | 0.826   |
| EBV DNA ( $\geq 4000$ vs. $< 4000$ )      | 2.843(1.388-5.823)     | 0.004   |
| EBV DNA ( $> 0$ vs. 0)                    | 1.097(0.568-2.118)     | 0.782   |
| CCD ( $\geq 160$ vs. $< 160$ )            | 0.456(0.222-0.939)     | 0.033   |
| <b>Distant metastasis-free survival</b>   |                        |         |
| Age (y) ( $\geq 45$ vs. $< 45$ )          | 0.736(0.440-1.230)     | 0.243   |
| Gender (F vs. M)                          | 1.070(0.594-1.927)     | 0.821   |
| T category (3-4 vs. 1-2)                  | 1.116(0.538-2.313)     | 0.768   |
| N category (2-3 vs. 0-1)                  | 1.106(0.615-1.989)     | 0.736   |
| Overall stage (IVa-b vs. II-III)          | 0.904(0.543-1.505)     | 0.698   |
| EBV DNA ( $\geq 4000$ vs. $< 4000$ )      | 1.801(1.051-3.085)     | 0.032   |
| EBV DNA ( $> 0$ vs. 0)                    | 1.891(1.147-3.118)     | 0.013   |
| CCD ( $\geq 160$ vs. $< 160$ )            | 1.044(0.496-2.196)     | 0.911   |

Abbreviations: CI = confidence interval; EBV= Epstein–Barr virus; IC = induction chemotherapy.

A Cox proportional hazards regression model was used to detect variables individually without adjustment. All variables were transformed into categorical variables. HRs were calculated for age (years:  $\geq 45$  vs.  $< 45$ ), sex (female vs. male), T stage (T3-4 vs. T1-2), N stage (N2-3 vs. N0-1), plasma EBV DNA before the first treatment ( $\geq 4000$  copies/ml vs.  $< 4000$  copies/ml), plasma EBV DNA after IC ( $> 0$  copies/ml vs. 0 copies/ml), and overall stage (IVa-b vs. II-III).

comparison with patients receiving a total CCD  $\geq 160\text{mg/m}^2$ . However, in the subgroup of patients with undetectable EBV DNA levels after IC, there were no significant differences in survival endpoints between patients receiving different CCD regimens.

Several studies have demonstrated that IC confers a survival benefit in locally advanced NPC patients [7–9]. However, a small proportion of patients did not respond to cisplatin-based IC. In previous studies, the percentages of patients with detectable EBV DNA

levels after IC ranged from 23.7%-33.8% [11, 15, 16]. In our study, EBV DNA levels after IC were detectable in 32.6% of patients (179 of 549), which was consistent with previous results. In addition, previous studies proved that the EBV DNA load after IC is an earlier and powerful prognostic factor in patients with NPC [11, 16]. Our results are in good agreement with the findings of these studies, which demonstrated that the EBV DNA load after IC was an independent prognostic factor for PFS, OS, and DMFS, but not LRFS. Specifically, patients with detectable EBV DNA after IC most frequently experienced distant failure. The EBV DNA load after IC may be useful for risk stratification and early identification of higher-risk patients before CCRT to guide clinicians in adjusting the intensity of concurrent chemoradiotherapy as early as possible to improve the therapeutic effect and eventually improve survival.

Cisplatin-based concurrent chemotherapy administered during RT is important in conferring survival benefits [17, 18]. Many previous studies have reported the prognostic value of CCD, and a CCD of 200 mg/m<sup>2</sup> has been shown to significantly improve the prognosis in NPC patients receiving CCRT [14, 19–22]. In addition, Peng et al. retrospectively assessed the relationship between the CCD and the prognosis of NPC patients receiving CCRT without IC, which found that CCD ( $\geq 240$  mg/m<sup>2</sup>) had no prognostic value in subgroup analysis with stratification by the cut-off value of pre-DNA (1460 copies/ml). However, all patients in our study received IC+CCRT and we did subgroup analysis based on the EBV DNA load after IC, which distinguished from their study [23]. Lv and colleagues found that a CCD of 200 mg/m<sup>2</sup> did not yield significant improvements in survival outcomes in NPC patients receiving IC plus CCRT, while a CCD of 160 mg/m<sup>2</sup>

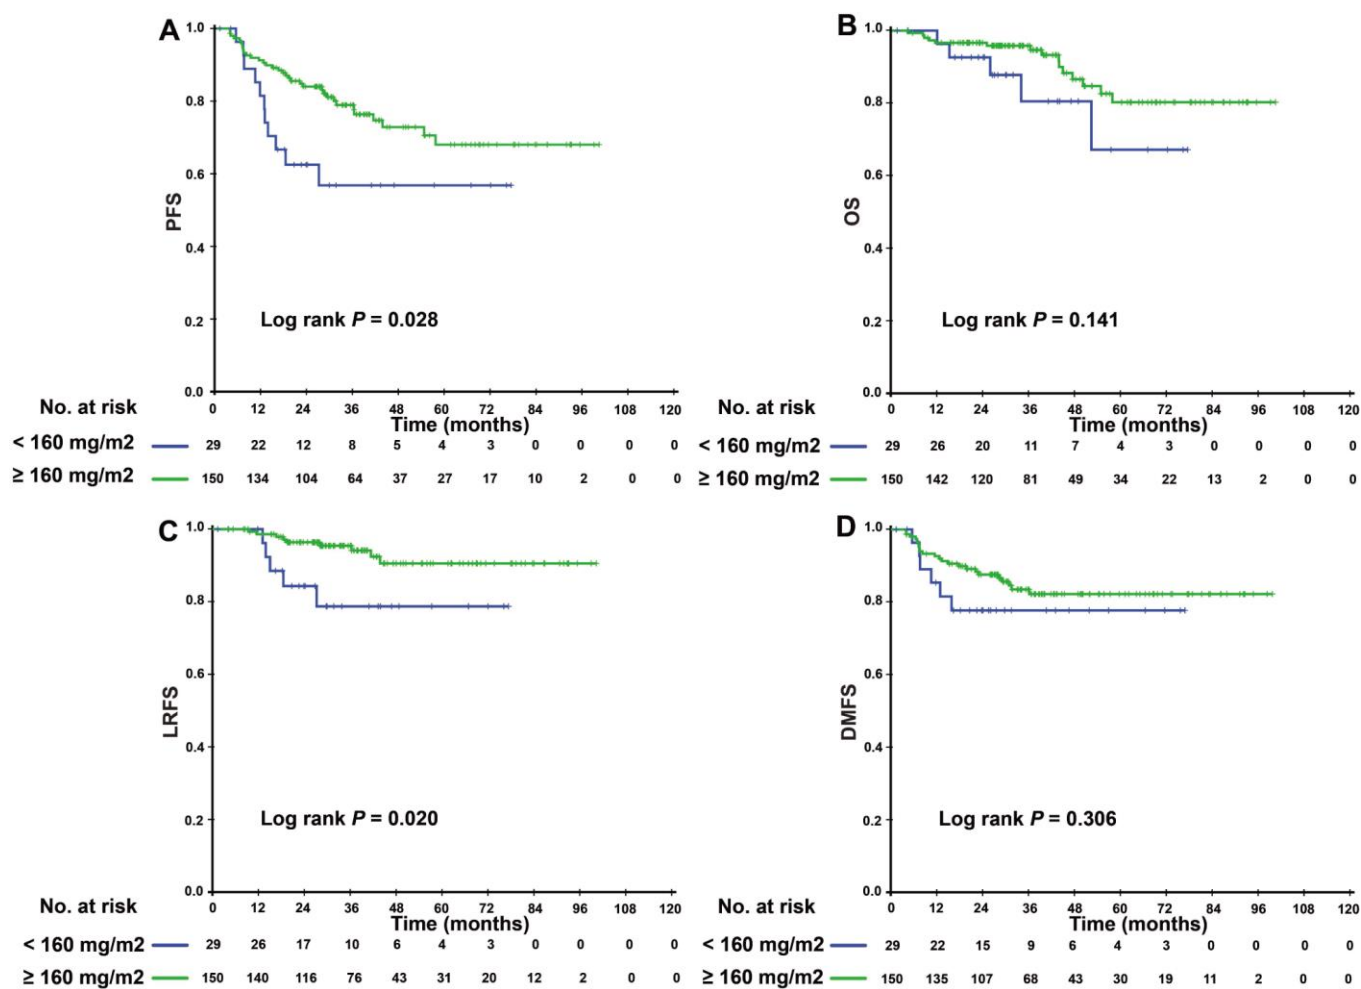

**Figure 2.** Kaplan–Meier PFS (A), OS (B), LRFS (C), and DMFS (D) curves for the subgroup of 174 NPC patients with detectable EBV DNA level after induction chemotherapy stratified by CCD  $< 160$  mg/m<sup>2</sup>, and CCD  $\geq 160$  mg/m<sup>2</sup>. Abbreviations: PFS = progression-free survival; OS = overall survival; LRFS = local-regional relapse-free survival; DMFS = distant metastasis-free survival; NPC, nasopharyngeal carcinoma; CCD = cumulative cisplatin dose.

**Table 3. Multivariate analysis of prognostic factors for 179 NPC patients with detectable EBV DNA after induction chemotherapy.**

|                                           | <b>Hazard ratio* (95% CI)</b> | <b>P value</b> |
|-------------------------------------------|-------------------------------|----------------|
| <b>Progression-free survival</b>          |                               |                |
| Age (y) (≥ 45 vs. < 45)                   | 1.028(0.561-1.883)            | 0.930          |
| Gender (F vs. M)                          | 1.053(0.516-2.151)            | 0.887          |
| T category (3-4 vs. 1-2)                  | 0.985(0.444-2.186)            | 0.971          |
| N category (2-3 vs. 0-1)                  | 0.847(0.433-1.657)            | 0.628          |
| Overall stage (IVa-b vs. II-III)          | 1.044(0.557-1.956)            | 0.894          |
| EBV DNA (≥4000 vs. <4000)                 | 2.160(1.068-4.368)            | 0.032          |
| CCD (≥160 vs. < 160)                      | 0.497(0.250-0.988)            | 0.046          |
| <b>Overall survival</b>                   |                               |                |
| Age (y) (≥ 45 vs. < 45)                   | 1.295(0.512-3.275)            | 0.586          |
| Gender (F vs. M)                          | 0.827(0.294-2.322)            | 0.718          |
| T category (3-4 vs. 1-2)                  | 0.650(0.199-2.120)            | 0.475          |
| N category (2-3 vs. 0-1)                  | 0.601(0.234-1.541)            | 0.289          |
| Overall stage (IVa-b vs. II-III)          | 1.738(0.637-4.737)            | 0.280          |
| EBV DNA (≥4000 vs. <4000)                 | 1.127(0.430-2.955)            | 0.807          |
| CCD (≥160 vs. < 160)                      | 0.508(0.180-1.433)            | 0.201          |
| <b>Locoregional relapse-free survival</b> |                               |                |
| Age (y) (≥ 45 vs. < 45)                   | 1.478(0.506-4.313)            | 0.475          |
| Gender (F vs. M)                          | 0.712(0.219-2.312)            | 0.572          |
| T category (3-4 vs. 1-2)                  | 1.028(0.205-5.144)            | 0.973          |
| N category (2-3 vs. 0-1)                  | 0.538(0.169-1.713)            | 0.294          |
| Overall stage (IVa-b vs. II-III)          | 2.167(0.571-8.221)            | 0.256          |
| EBV DNA (≥4000 vs. <4000)                 | 9.197(1.163-72.750)           | 0.035          |
| CCD (≥160 vs. < 160)                      | 0.325(0.106-0.993)            | 0.049          |
| <b>Distant metastasis-free survival</b>   |                               |                |
| Age (y) (≥ 45 vs. < 45)                   | 1.045(0.494-2.211)            | 0.909          |
| Gender (F vs. M)                          | 1.107(0.442-2.773)            | 0.828          |
| T category (3-4 vs. 1-2)                  | 1.093 (0.404-2.952)           | 0.861          |
| N category (2-3 vs. 0-1)                  | 1.063(0.440-2.567)            | 0.892          |
| Overall stage (IVa-b vs. II-III)          | 0.782(0.367-1.665)            | 0.523          |
| EBV DNA (≥4000 vs. <4000)                 | 1.903(0.819-4.421)            | 0.135          |
| CCD (≥160 vs. < 160)                      | 0.660(0.266-1.636)            | 0.369          |

Abbreviations: CI = confidence interval; EBV= Epstein–Barr virus; IC = induction chemotherapy.

A Cox proportional hazards regression model was used to detect variables individually without adjustment. All variables were transformed into categorical variables. HRs were calculated for age (years: ≥45 vs. <45), sex (female vs. male), T stage (T3-4 vs. T1-2), N stage (N2-3 vs. N0-1), plasma EBV DNA before the first treatment (≥4000 copies/ml vs. <4000 copies/ml), and overall stage (IVa vs. II-III).

might be enough to yield beneficial antitumor effects [24]. However, their study sample was relatively small, and the prognostic difference was discussed only for the whole cohort and subgroup according to the EBV DNA load after IC has never been done before, which could distinguish patients with locoregionally advanced NPC into a low-risk group (with undetectable EBV DNA) and a high-risk group (with detectable EBV DNA). Patients with a detectable EBV DNA load after IC who have a higher tumor burden had a higher risk of recurrence and

metastasis in the future, which indicates that they should receive intensification of therapy, and our results demonstrated that an increasing CCD seemed to achieve better local control for those higher-risk patients. Although there was an association between CCD and PFS and LRFS in subgroups of patients with detectable EBV DNA load after IC, the prognostic effect was not observed in terms of OS and DMFS. Our results were consistent with the study conducted by Lee et al., which confirmed that concurrent chemoradiotherapy could

significantly improve tumor control, particularly at locoregional sites. In addition, our research proved that there were no significant differences in survival endpoints between patients receiving the different regimens of CCD in the low-risk group. For the low-risk group with a better prognosis, reducing the treatment intensity could be taken into consideration to avoid unnecessary toxicities and cost. The initial treatment of NPC is very important, and determining the appropriate course of chemotherapy is crucial, while the EBV DNA load after completion of IC is an ideal marker providing an adequate basis for determining the optimal treatment regime. Therefore, it is possible that the EBV DNA load after IC could guide clinicians in adjusting concurrent chemotherapy treatment intensity to improve the therapeutic effect and finally improve survival as early as possible before CCRT.

These findings provide us with a new clinical implication that the EBV DNA load after IC should be

considered as an important stratification factor for the design of different intensive concurrent chemotherapies in patients with lower or higher viral loads in future trials. Selecting the treatment strategy for IC based on the EBV DNA level may enable further improvement in NPC prognosis. In our opinion, routine delivery of three courses of cisplatin-based concurrent chemotherapy (80-100 mg/m<sup>2</sup>) or six courses (30-40 mg/m<sup>2</sup>) for “all” advanced-stage NPC patients should be reconsidered. Indeed, patients with advanced disease included a heterogeneous group with variable relapse rate. Pretreatment prognostic factors (patient characteristics and initial clinical stages) are no longer important because the tumors in most patients are mostly eradicated after initial IC. As IC continues, the EBV DNA load after IC may reflect the tumor response to treatment and dynamically select the subgroup with a high risk of distant metastasis; thus, it is a potential predictor to guide clinicians to modify treatment strategy in a timely manner. On the other hand,

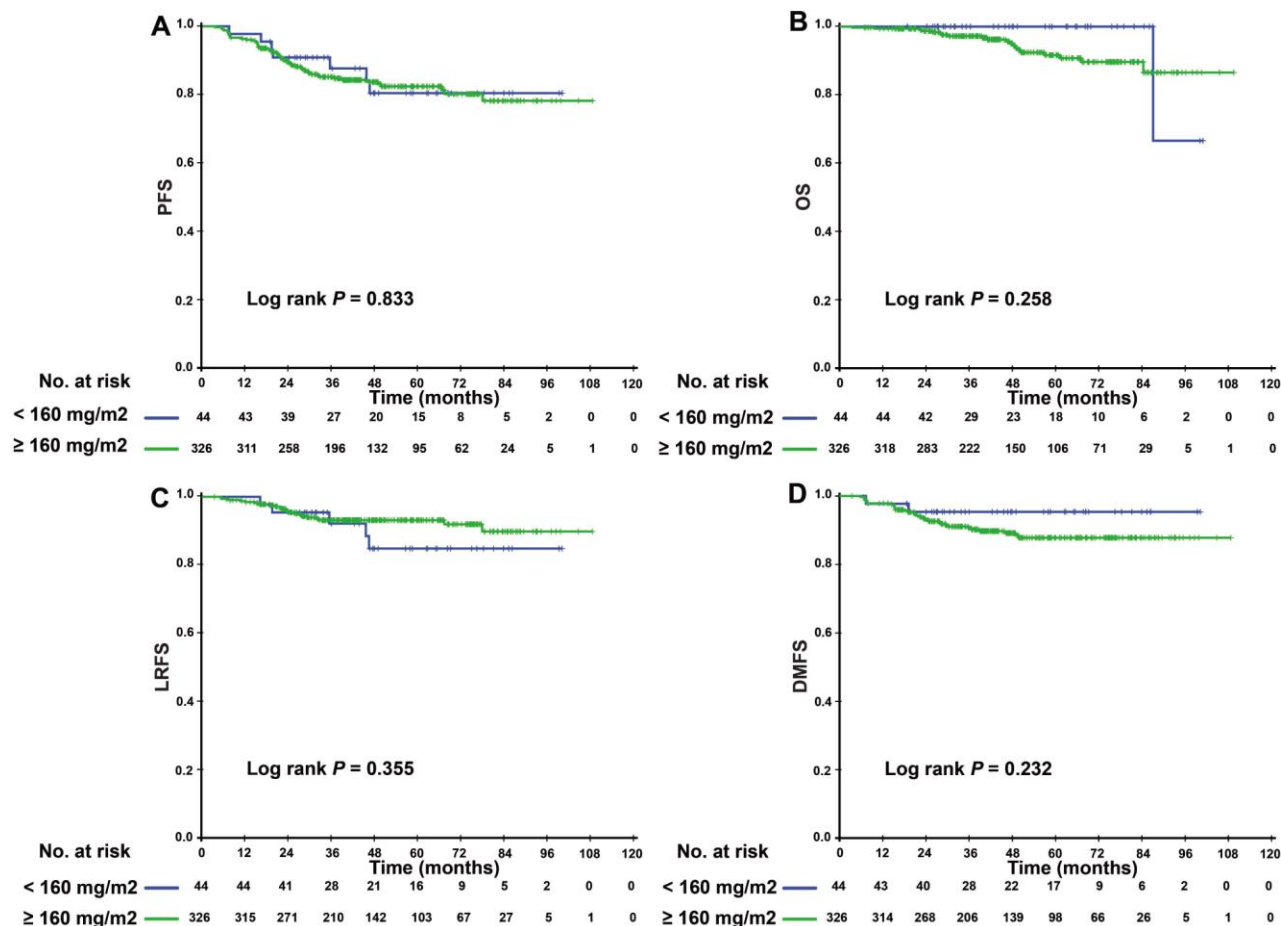

**Figure 3.** Kaplan–Meier PFS (A), OS (B), LRFS (C), and DMFS (D) curves for the subgroup of 370 NPC patients with undetectable EBV DNA level after induction chemotherapy stratified by CCD < 160 mg/m<sup>2</sup>, and CCD ≥ 160 mg/m<sup>2</sup>. Abbreviations: PFS = progression-free survival; OS = overall survival; LRFS = local-regional relapse-free survival; DMFS = distant metastasis-free survival; NPC, nasopharyngeal carcinoma; CCD = cumulative cisplatin dose.



immunotherapy and targeted therapy could also be taken into consideration for patients with EBV DNA loads after IC to improve the therapeutic effect and finally improve survival on the basis of increasing the concurrent cisplatin dose.

Nevertheless, the present study has several limitations. First, there was an inevitable selection bias caused by the retrospective nature of the study. Second, the data were obtained exclusively from one center; therefore, these results must be validated by other institutions. Third, the follow-up duration of our study was short. It is necessary to use longer follow-up periods to both evaluate the long-term outcomes of these patients and validate our results.

## CONCLUSIONS

Plasma EBV DNA level after IC is an independent prognostic factor for patients with NPC. Enhancement of CCD was not associated with a survival benefit in patients with undetected EBV DNA after IC. However, among patients who showed EBV DNA after IC, those receiving  $\geq 160$  mg/m<sup>2</sup> CCD showed significantly improved 3-year PFS and LRFS than those receiving  $< 160$  mg/m<sup>2</sup> CCD. Our data suggest that increasing the CCD could improve the efficacy for these patients.

## MATERIALS AND METHODS

### Patients

From 2009 to 2017, 549 patients with local advanced NPC at Sun Yat-sen University Cancer Center, China, were included in our study. The eligibility criteria for the study were as follows: (1) pathologically confirmed NPC of stages II-IV; (2) Karnofsky performance score (KPS) of  $> 70$ ; (3) treated using IMRT; (4) treatment with first-line IC and cisplatin-based concurrent chemotherapy regimen; (5) availability of EBV DNA data after IC; and (6) adequate organ function. The exclusion criteria were as follows: any history of malignancy; received previous anti-tumor treatment; received palliative treatment; the presence of pregnancy, lactation or severe coexisting illness.

### Pretreatment evaluation

All patients underwent a complete physical examination, fiberoptic nasopharyngoscopy, magnetic resonance imaging (MRI) of the nasopharynx and neck, chest radiography, bone scan or whole-body fluorodeoxyglucose positron emission tomography (PET)/computed tomography (CT), complete blood count, renal and liver function tests, and plasma EBV DNA level determination.

### Plasma EBV DNA level assessment

Plasma EBV DNA concentrations were measured by real-time quantitative polymerase chain reaction before treatment and after IC [25, 26]. The cutoff values for pretreatment EBV DNA level and EBV DNA level after IC were 4000 copies/mL and 0 copy/mL, respectively, which has been established as a prognostic value in previous studies [11, 27].

### Treatment and evaluation

All patients received one of the following IC regimens: PF (consisting of cisplatin [1 day of 80-100 mg/m<sup>2</sup>] and 5-fluorouracil [800-1000 mg/m<sup>2</sup>, by 120 h of continuous intravenous infusion]), TP (consisting of docetaxel [1 day of 75 mg/m<sup>2</sup>] or paclitaxel [1 day of 150-180 mg/m<sup>2</sup>] or paclitaxel liposome [1 day of 150-180 mg/m<sup>2</sup>] and cisplatin [20-25 mg/m<sup>2</sup> on days 1-3]) and TPF (consisting of docetaxel [1 day of 60 mg/m<sup>2</sup>] or paclitaxel [1 day of 135 mg/m<sup>2</sup>] or paclitaxel liposome [1 day of 135 mg/m<sup>2</sup>], cisplatin [1 day of 60 mg/m<sup>2</sup>], and 5-fluorouracil [500-800 mg/m<sup>2</sup>, by 120 h of continuous intravenous infusion]). All regimens were administered at intervals of 3 weeks for 2-4 cycles.

All patients received IMRT. Gross tumor volume included the primary tumor and the positive retropharyngeal lymph node. A total dose of 68-70 Gy was administered with the daily fraction ranging from 2.00 Gy to 2.34 Gy. Other details of the IMRT plan were in accordance with previous studies [28-30]. Concurrent cisplatin-based chemotherapy (80-100 mg/m<sup>2</sup> every 3 weeks or 30-40 mg/m<sup>2</sup> weekly) was administered during radiotherapy [18, 31].

### Outcome and follow-up

Our primary study endpoint was progression-free survival (PFS), which was calculated from the first day of treatment to the date of any treatment failure or death from any cause. The secondary endpoints included overall survival (OS), which was calculated from the first day of treatment to the date of death from any cause; distant metastasis-free survival (DMFS), which was calculated from the first day of treatment to the date of distant metastasis; and locoregional relapse-free survival (LRFS), which was calculated from the first day of treatment to the date of locoregional failure. After treatment, the patients were examined every 3 months for the first 3 years and every 6 months thereafter or until death.

### Statistical analysis

All statistical analyses in our study were performed using SPSS package for Windows, version 22.0

(Chicago, IL). Categorical variables were compared by Chi-square test or Fisher's exact test. Survival parameters were calculated using Kaplan–Meier actuarial analysis and differences were compared using the log-rank test. Multivariate analyses were performed using the Cox proportional hazards regression model. All analyses were two-sided. The level of significance was set at  $P < 0.05$ .

### Ethics approval

This retrospective study was approved by the Clinical Research Committee of Sun Yat-sen University Cancer Center. Patients were required to provide written informed consent before enrolling in the study.

### AUTHOR CONTRIBUTIONS

HQM, LG and LQT developed the study concepts; SLL, XSS, and LTL participated in study design; SLL, XSS, LTL, RS, DHL, and LY participated in data acquisition; SLL, XSS, and LTL participated in quality control of data and algorithms; SLL and XSS participated in data analysis and interpretation; SLL, XSS, RS, DHL, and LTL participated in statistical analysis; SLL, QYC, and HXL participated in manuscript preparation; SLL and LY participated in manuscript editing; and HQM, LG and LQT participated in manuscript review. All authors have read and approved the manuscript.

### ACKNOWLEDGMENTS

We kindly thank the editor and reviewers for their careful review and valuable comments, which have led to significant improvement of the manuscript.

### CONFLICTS OF INTEREST

The authors declare that they have no competing interests. None of the authors has any financial and personal relationships with other people or organizations that could inappropriately influence (bias) of this work.

### FUNDING

This work was supported by grants from the National Key R&D Program of China (2017YFC1309003 and 2017YFC0908500), the National Natural Science Foundation of China (Nos. 81425018, 81672868, 81602371, and 81802775), the Sci-Tech Project Foundation of Guangzhou City (201707020039), the Sun Yat-sen University Clinical Research 5010 Program, the Special Support Plan of Guangdong Province (No. 2014TX01R145), the Natural Science Foundation of Guangdong Province (Nos.

2017A030312003 and 2018A0303131004), the Natural Science Foundation of Guangdong Province for Distinguished Young Scholar (No. 2018B03036001) Sci-Tech Project Foundation of Guangdong Province (No. 2014A020212103), the Health & Medical Collaborative Innovation Project of Guangzhou City (Nos. 201400000001 and 201803040003), Pearl River S&T Nova Program of Guangzhou (No. 201806010135), the Planned Science and Technology Project of Guangdong Province (2019B020230002), the National Science & Technology Pillar Program during the Twelfth Five-year Plan Period (No. 2014BAI09B10), the PhD Start-up Fund of Natural Science Foundation of Guangdong Province (2016A030310221), the cultivation foundation for the junior teachers in Sun Yat-sen University (16yky28), and the Fundamental Research Funds for the Central Universities.

### REFERENCES

1. Cao SM, Simons MJ, Qian CN. The prevalence and prevention of nasopharyngeal carcinoma in China. *Chin J Cancer*. 2011; 30:114–19. <https://doi.org/10.5732/cjc.010.10377> PMID:[21272443](https://pubmed.ncbi.nlm.nih.gov/21272443/)
2. Simons MJ. The origin of genetic risk for nasopharyngeal carcinoma: a commentary on: is nasopharyngeal cancer really a “Cantonese cancer”? *Chin J Cancer*. 2010; 29:527–37. <https://doi.org/10.5732/cjc.010.10070> PMID:[20426904](https://pubmed.ncbi.nlm.nih.gov/20426904/)
3. Gulley ML. Molecular diagnosis of Epstein-Barr virus-related diseases. *J Mol Diagn*. 2001; 3:1–10. [https://doi.org/10.1016/S1525-1578\(10\)60642-3](https://doi.org/10.1016/S1525-1578(10)60642-3) PMID:[11227065](https://pubmed.ncbi.nlm.nih.gov/11227065/)
4. Blanchard P, Lee A, Marguet S, Leclercq J, Ng WT, Ma J, Chan AT, Huang PY, Benhamou E, Zhu G, Chua DT, Chen Y, Mai HQ, et al, and MAC-NPC Collaborative Group. Chemotherapy and radiotherapy in nasopharyngeal carcinoma: an update of the MAC-NPC meta-analysis. *Lancet Oncol*. 2015; 16:645–55. [https://doi.org/10.1016/S1470-2045\(15\)70126-9](https://doi.org/10.1016/S1470-2045(15)70126-9) PMID:[25957714](https://pubmed.ncbi.nlm.nih.gov/25957714/)
5. Chen L, Hu CS, Chen XZ, Hu GQ, Cheng ZB, Sun Y, Li WX, Chen YY, Xie FY, Liang SB, Chen Y, Xu TT, Li B, et al. Concurrent chemoradiotherapy plus adjuvant chemotherapy versus concurrent chemoradiotherapy alone in patients with locoregionally advanced nasopharyngeal carcinoma: a phase 3 multicentre randomised controlled trial. *Lancet Oncol*. 2012; 13:163–71. [https://doi.org/10.1016/S1470-2045\(11\)70320-5](https://doi.org/10.1016/S1470-2045(11)70320-5) PMID:[22154591](https://pubmed.ncbi.nlm.nih.gov/22154591/)

6. Chen QY, Wen YF, Guo L, Liu H, Huang PY, Mo HY, Li NW, Xiang YQ, Luo DH, Qiu F, Sun R, Deng MQ, Chen MY, et al. Concurrent chemoradiotherapy vs radiotherapy alone in stage II nasopharyngeal carcinoma: phase III randomized trial. *J Natl Cancer Inst.* 2011; 103:1761–70.  
<https://doi.org/10.1093/jnci/djr432> PMID:22056739
7. Hui EP, Ma BB, Leung SF, King AD, Mo F, Kam MK, Yu BK, Chiu SK, Kwan WH, Ho R, Chan I, Ahuja AT, Zee BC, Chan AT. Randomized phase II trial of concurrent cisplatin-radiotherapy with or without neoadjuvant docetaxel and cisplatin in advanced nasopharyngeal carcinoma. *J Clin Oncol.* 2009; 27:242–49.  
<https://doi.org/10.1200/JCO.2008.18.1545> PMID:19064973
8. Sun Y, Li WF, Chen NY, Zhang N, Hu GQ, Xie FY, Sun Y, Chen XZ, Li JG, Zhu XD, Hu CS, Xu XY, Chen YY, et al. Induction chemotherapy plus concurrent chemoradiotherapy versus concurrent chemoradiotherapy alone in locoregionally advanced nasopharyngeal carcinoma: a phase 3, multicentre, randomised controlled trial. *Lancet Oncol.* 2016; 17:1509–20.  
[https://doi.org/10.1016/S1470-2045\(16\)30410-7](https://doi.org/10.1016/S1470-2045(16)30410-7) PMID:27686945
9. Zhang Y, Chen L, Hu GQ, Zhang N, Zhu XD, Yang KY, Jin F, Shi M, Chen YP, Hu WH, Cheng ZB, Wang SY, Tian Y, et al. Gemcitabine and Cisplatin Induction Chemotherapy in Nasopharyngeal Carcinoma. *N Engl J Med.* 2019; 381:1124–35.  
<https://doi.org/10.1056/NEJMoa1905287> PMID:31150573
10. Sun X, Su S, Chen C, Han F, Zhao C, Xiao W, Deng X, Huang S, Lin C, Lu T. Long-term outcomes of intensity-modulated radiotherapy for 868 patients with nasopharyngeal carcinoma: an analysis of survival and treatment toxicities. *Radiother Oncol.* 2014; 110:398–403.  
<https://doi.org/10.1016/j.radonc.2013.10.020> PMID:24231245
11. Liu LT, Tang LQ, Chen QY, Zhang L, Guo SS, Guo L, Mo HY, Zhao C, Guo X, Cao KJ, Qian CN, Zeng MS, Bei JX, et al. The Prognostic Value of Plasma Epstein-Barr Viral DNA and Tumor Response to Neoadjuvant Chemotherapy in Advanced-Stage Nasopharyngeal Carcinoma. *Int J Radiat Oncol Biol Phys.* 2015; 93:862–69.  
<https://doi.org/10.1016/j.ijrobp.2015.08.003> PMID:26530755
12. Sun XS, Liu LT, Liu SL, Guo SS, Wen YF, Xie HJ, Tang QN, Liang YJ, Li XY, Yan JJ, Ma J, Chen QY, Tang LQ, Mai HQ. Identifying optimal candidates for local treatment of the primary tumor among patients with de novo metastatic nasopharyngeal carcinoma: a retrospective cohort study based on Epstein-Barr virus DNA level and tumor response to palliative chemotherapy. *BMC Cancer.* 2019; 19:92.  
<https://doi.org/10.1186/s12885-019-5281-5> PMID:30665378
13. Chan AT, Teo PM, Ngan RK, Leung TW, Lau WH, Zee B, Leung SF, Cheung FY, Yeo W, Yiu HH, Yu KH, Chiu KW, Chan DT, et al. Concurrent chemotherapy-radiotherapy compared with radiotherapy alone in locoregionally advanced nasopharyngeal carcinoma: progression-free survival analysis of a phase III randomized trial. *J Clin Oncol.* 2002; 20:2038–44.  
<https://doi.org/10.1200/JCO.2002.08.149> PMID:11956263
14. Guo SS, Tang LQ, Zhang L, Chen QY, Liu LT, Guo L, Mo HY, Luo DH, Huang PY, Xiang YQ, Sun R, Chen MY, Wang L, et al. The impact of the cumulative dose of cisplatin during concurrent chemoradiotherapy on the clinical outcomes of patients with advanced-stage nasopharyngeal carcinoma in an era of intensity-modulated radiotherapy. *BMC Cancer.* 2015; 15:977.  
<https://doi.org/10.1186/s12885-015-1964-8> PMID:26675209
15. Liu SL, Sun XS, Yan JJ, Chen QY, Lin HX, Wen YF, Guo SS, Liu LT, Xie HJ, Tang QN, Liang YJ, Li XY, Lin C, et al. Optimal cumulative cisplatin dose in nasopharyngeal carcinoma patients based on induction chemotherapy response. *Radiother Oncol.* 2019; 137:83–94.  
<https://doi.org/10.1016/j.radonc.2019.04.020> PMID:31078941
16. Huang CL, Sun ZQ, Guo R, Liu X, Mao YP, Peng H, Tian L, Lin AH, Li L, Shao JY, Sun Y, Ma J, Tang LL. Plasma Epstein-Barr Virus DNA Load After Induction Chemotherapy Predicts Outcome in Locoregionally Advanced Nasopharyngeal Carcinoma. *Int J Radiat Oncol Biol Phys.* 2019; 104:355–61.  
<https://doi.org/10.1016/j.ijrobp.2019.01.007> PMID:30682489
17. Lin JC, Jan JS, Hsu CY, Liang WM, Jiang RS, Wang WY. Phase III study of concurrent chemoradiotherapy versus radiotherapy alone for advanced nasopharyngeal carcinoma: positive effect on overall and progression-free survival. *J Clin Oncol.* 2003; 21:631–37.  
<https://doi.org/10.1200/JCO.2003.06.158> PMID:12586799
18. Al-Sarraf M, LeBlanc M, Giri PG, Fu KK, Cooper J, Vuong T, Forastiere AA, Adams G, Sakr WA, Schuller DE, Ensley JF. Chemoradiotherapy versus radiotherapy in patients with advanced nasopharyngeal cancer: phase III randomized Intergroup study 0099. *J Clin Oncol.* 1998; 16:1310–17.

- <https://doi.org/10.1200/JCO.1998.16.4.1310>  
PMID:[9552031](https://pubmed.ncbi.nlm.nih.gov/9552031/)
19. Loong HH, Ma BB, Leung SF, Mo F, Hui EP, Kam MK, Chan SL, Yu BK, Chan AT. Prognostic significance of the total dose of cisplatin administered during concurrent chemoradiotherapy in patients with locoregionally advanced nasopharyngeal carcinoma. *Radiother Oncol*. 2012; 104:300–04.  
<https://doi.org/10.1016/j.radonc.2011.12.022>  
PMID:[22300609](https://pubmed.ncbi.nlm.nih.gov/22300609/)
  20. Wei W, Huang Z, Li S, Chen H, Zhang G, Li S, Hu W, Xu T. Pretreatment Epstein-Barr virus DNA load and cumulative cisplatin dose intensity affect long-term outcome of nasopharyngeal carcinoma treated with concurrent chemotherapy: experience of an institute in an endemic area. *Oncol Res Treat*. 2014; 37:88–95.  
<https://doi.org/10.1159/000360178> PMID:[24685911](https://pubmed.ncbi.nlm.nih.gov/24685911/)
  21. Lee AW, Tung SY, Ngan RK, Chappell R, Chua DT, Lu TX, Siu L, Tan T, Chan LK, Ng WT, Leung TW, Fu YT, Au GK, et al. Factors contributing to the efficacy of concurrent-adjuvant chemotherapy for locoregionally advanced nasopharyngeal carcinoma: combined analyses of NPC-9901 and NPC-9902 Trials. *Eur J Cancer*. 2011; 47:656–66.  
<https://doi.org/10.1016/j.ejca.2010.10.026>  
PMID:[21112774](https://pubmed.ncbi.nlm.nih.gov/21112774/)
  22. Peng H, Chen L, Zhang Y, Li WF, Mao YP, Zhang F, Guo R, Liu LZ, Lin AH, Sun Y, Ma J. Prognostic Value of the Cumulative Cisplatin Dose During Concurrent Chemoradiotherapy in Locoregionally Advanced Nasopharyngeal Carcinoma: A Secondary Analysis of a Prospective Phase III Clinical Trial. *Oncologist*. 2016; 21:1369–76.  
<https://doi.org/10.1634/theoncologist.2016-0105>  
PMID:[27496040](https://pubmed.ncbi.nlm.nih.gov/27496040/)
  23. Peng H, Chen L, Li WF, Guo R, Mao YP, Zhang Y, Zhang F, Liu LZ, Tian L, Lin AH, Sun Y, Ma J. The Cumulative Cisplatin Dose Affects the Long-Term Survival Outcomes of Patients with Nasopharyngeal Carcinoma Receiving Concurrent Chemoradiotherapy. *Sci Rep*. 2016; 6:24332.  
<https://doi.org/10.1038/srep24332> PMID:[27071833](https://pubmed.ncbi.nlm.nih.gov/27071833/)
  24. Lv JW, Qi ZY, Zhou GQ, He XJ, Chen YP, Mao YP, Chen L, Tang LL, Li WF, Lin AH, Ma J, Sun Y. Optimal cumulative cisplatin dose in nasopharyngeal carcinoma patients receiving additional induction chemotherapy. *Cancer Sci*. 2018; 109:751–63.  
<https://doi.org/10.1111/cas.13474>  
PMID:[29266526](https://pubmed.ncbi.nlm.nih.gov/29266526/)
  25. Shao JY, Li YH, Gao HY, Wu QL, Cui NJ, Zhang L, Cheng G, Hu LF, Ernberg I, Zeng YX. Comparison of plasma Epstein-Barr virus (EBV) DNA levels and serum EBV immunoglobulin A/virus capsid antigen antibody titers in patients with nasopharyngeal carcinoma. *Cancer*. 2004; 100:1162–70.  
<https://doi.org/10.1002/cncr.20099>  
PMID:[15022282](https://pubmed.ncbi.nlm.nih.gov/15022282/)
  26. An X, Wang FH, Ding PR, Deng L, Jiang WQ, Zhang L, Shao JY, Li YH. Plasma Epstein-Barr virus DNA level strongly predicts survival in metastatic/recurrent nasopharyngeal carcinoma treated with palliative chemotherapy. *Cancer*. 2011; 117:3750–57.  
<https://doi.org/10.1002/cncr.25932>  
PMID:[21319149](https://pubmed.ncbi.nlm.nih.gov/21319149/)
  27. Chan AT, Lo YM, Zee B, Chan LY, Ma BB, Leung SF, Mo F, Lai M, Ho S, Huang DP, Johnson PJ. Plasma Epstein-Barr virus DNA and residual disease after radiotherapy for undifferentiated nasopharyngeal carcinoma. *J Natl Cancer Inst*. 2002; 94:1614–19.  
<https://doi.org/10.1093/jnci/94.21.1614>  
PMID:[12419787](https://pubmed.ncbi.nlm.nih.gov/12419787/)
  28. Lee AW, Lau KY, Hung WM, Ng WT, Lee MC, Choi CW, Chan CC, Tung R, Cheng PT, Yau TK. Potential improvement of tumor control probability by induction chemotherapy for advanced nasopharyngeal carcinoma. *Radiother Oncol*. 2008; 87:204–10.  
<https://doi.org/10.1016/j.radonc.2008.02.003>  
PMID:[18329742](https://pubmed.ncbi.nlm.nih.gov/18329742/)
  29. Lin S, Lu JJ, Han L, Chen Q, Pan J. Sequential chemotherapy and intensity-modulated radiation therapy in the management of locoregionally advanced nasopharyngeal carcinoma: experience of 370 consecutive cases. *BMC Cancer*. 2010; 10:39.  
<https://doi.org/10.1186/1471-2407-10-39>  
PMID:[20146823](https://pubmed.ncbi.nlm.nih.gov/20146823/)
  30. Yu Z, Luo W, Zhou QC, Zhang QH, Kang DH, Liu MZ. [Impact of changing gross tumor volume delineation of intensity-modulated radiotherapy on the dose distribution and clinical treatment outcome after induction chemotherapy for the primary locoregionally advanced nasopharyngeal carcinoma]. *Chin J Cancer*. 2009; 28:1132–37.  
<https://doi.org/10.5732/cjc.009.10435>  
PMID:[19895731](https://pubmed.ncbi.nlm.nih.gov/19895731/)
  31. Lee AW, Ngan RK, Tung SY, Cheng A, Kwong DL, Lu TX, Chan AT, Chan LL, Yiu H, Ng WT, Wong F, Yuen KT, Yau S, et al. Preliminary results of trial NPC-0501 evaluating the therapeutic gain by changing from concurrent-adjuvant to induction-concurrent chemoradiotherapy, changing from fluorouracil to capecitabine, and changing from conventional to accelerated radiotherapy fractionation in patients with locoregionally advanced nasopharyngeal carcinoma. *Cancer*. 2015; 121:1328–38.  
<https://doi.org/10.1002/cncr.29208>  
PMID:[25529384](https://pubmed.ncbi.nlm.nih.gov/25529384/)

SUPPLEMENTARY MATERIALS

Supplementary Figure

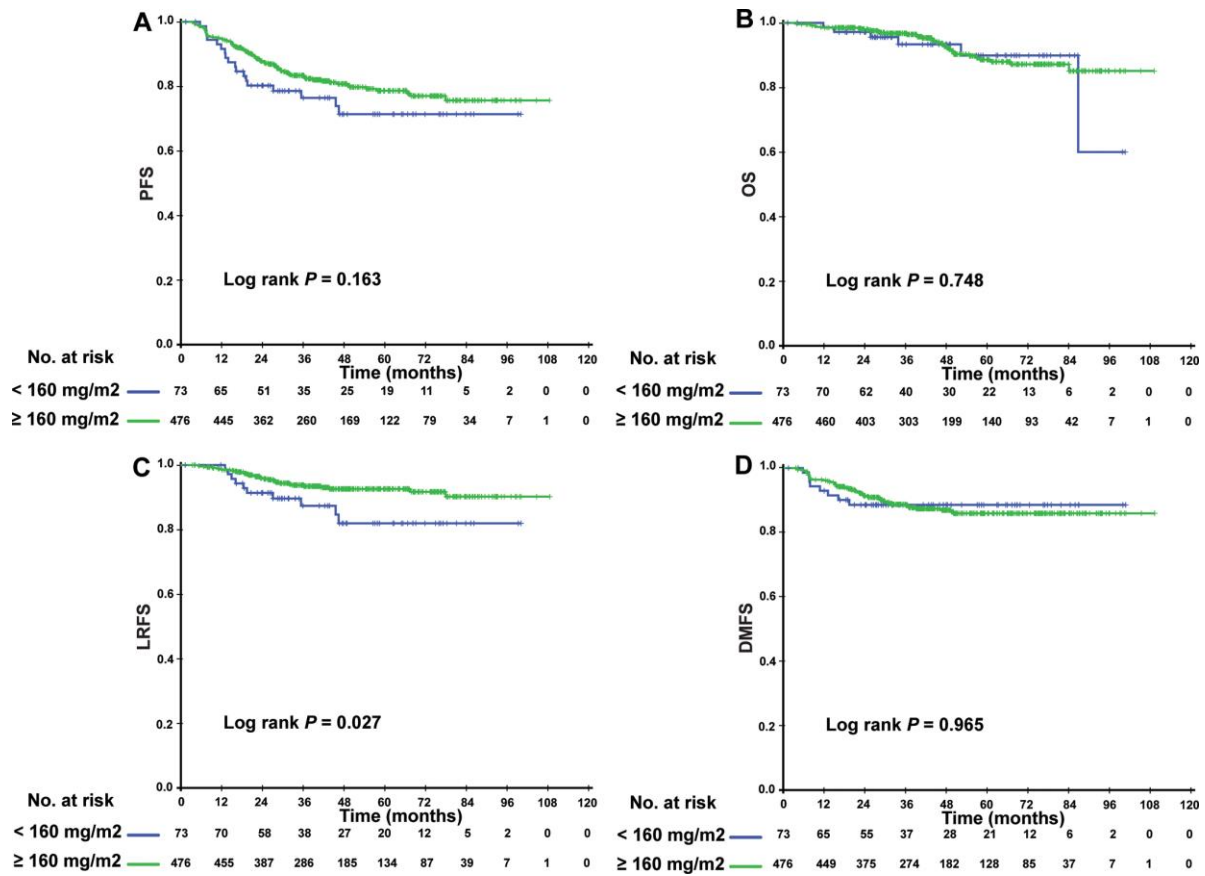

**Supplementary Figure 1.** Kaplan–Meier PFS (A), OS (B), LRFS (C), and DMFS (D) curves for 549 NPC patients stratified by CCD < 160 mg/m<sup>2</sup>, and CCD ≥ 160 mg/m<sup>2</sup>. Abbreviations: PFS = progression-free survival; OS = overall survival; LRFS = local-regional relapse-free survival; DMFS = distant metastasis-free survival; NPC, nasopharyngeal carcinoma; CCD = cumulative cisplatin dose.

## Supplementary Table

**Supplementary Table 1. Grade 1–4 acute toxicities due to CCRT between the different CCD groups.**

| Adverse event<br>(toxicity grade) | CCD < 160 (n=73) |          |          |        | CCD ≥ 160 (n=476) |           |           |         | p value<br>for<br>events<br>grade ≥1 |
|-----------------------------------|------------------|----------|----------|--------|-------------------|-----------|-----------|---------|--------------------------------------|
|                                   | 1(%)             | 2(%)     | 3 (%)    | 4(%)   | 1(%)              | 2(%)      | 3 (%)     | 4(%)    |                                      |
| Leucocytopenia                    | 17(23.3)         | 30(41.1) | 14(19.2) | 0(0.0) | 99(20.8)          | 206(43.3) | 100(21.0) | 7(1.5)  | 0.491                                |
| Neutropenia                       | 21(28.8)         | 19(26.0) | 9(26.0)  | 1(1.4) | 142(29.8)         | 134(28.2) | 44(9.2)   | 15(2.2) | 0.688                                |
| Anemia                            | 35(47.9)         | 21(28.8) | 0(0.0)   | 1(1.4) | 213(44.7)         | 145(30.5) | 30(6.3)   | 8(1.7)  | 0.284                                |
| Thrombocytopenia                  | 10(13.7)         | 3(4.1)   | 4(5.5)   | 1(1.4) | 61(12.8)          | 38(8.0)   | 12(2.5)   | 3(0.6)  | 0.895                                |
| AST increase                      | 5(6.8)           | 3(4.1)   | 1(1.4)   | 0(0.0) | 37(7.8)           | 4(0.8)    | 1(0.2)    | 1(0.2)  | 0.371                                |
| ALT increase                      | 8(11.0)          | 1(1.4)   | 3(4.1)   | 0(0.0) | 114(23.9)         | 10(2.1)   | 2(0.4)    | 1(0.2)  | 0.061                                |
| BUN increase                      | 21(28.8)         | 0(0.0)   | 0(0.0)   | 0(0.0) | 201(42.2)         | 3(0.6)    | 0(0.0)    | 1(0.2)  | 0.021                                |
| Creatinine<br>increase            | 11(15.1)         | 1(1.4)   | 0(0.0)   | 0(0.0) | 114(23.9)         | 2(0.4)    | 1(0.1)    | 0(0.0)  | 0.127                                |

Abbreviations: CCRT = concurrent chemoradiotherapy; CCD = cumulative cisplatin dose; ALT = alanine aminotransferase; AST = aspartate aminotransferase; BUN = blood urea nitrogen.

P values were calculated by Chi-square test.
