# Supplementary material for: Optimal cumulative cisplatin dose in nasopharyngeal carcinoma patients based on plasma Epstein–Barr virus DNA level after induction chemotherapy
Source: publisher site journal article supplement (doi:10.18632/aging.102920), 2020-03-27
Supplement: Supplementary file [file aging-v12i6-102920-supplementary-material-SD1.pdf]

**SUPPLEMENTARY FIGURE**

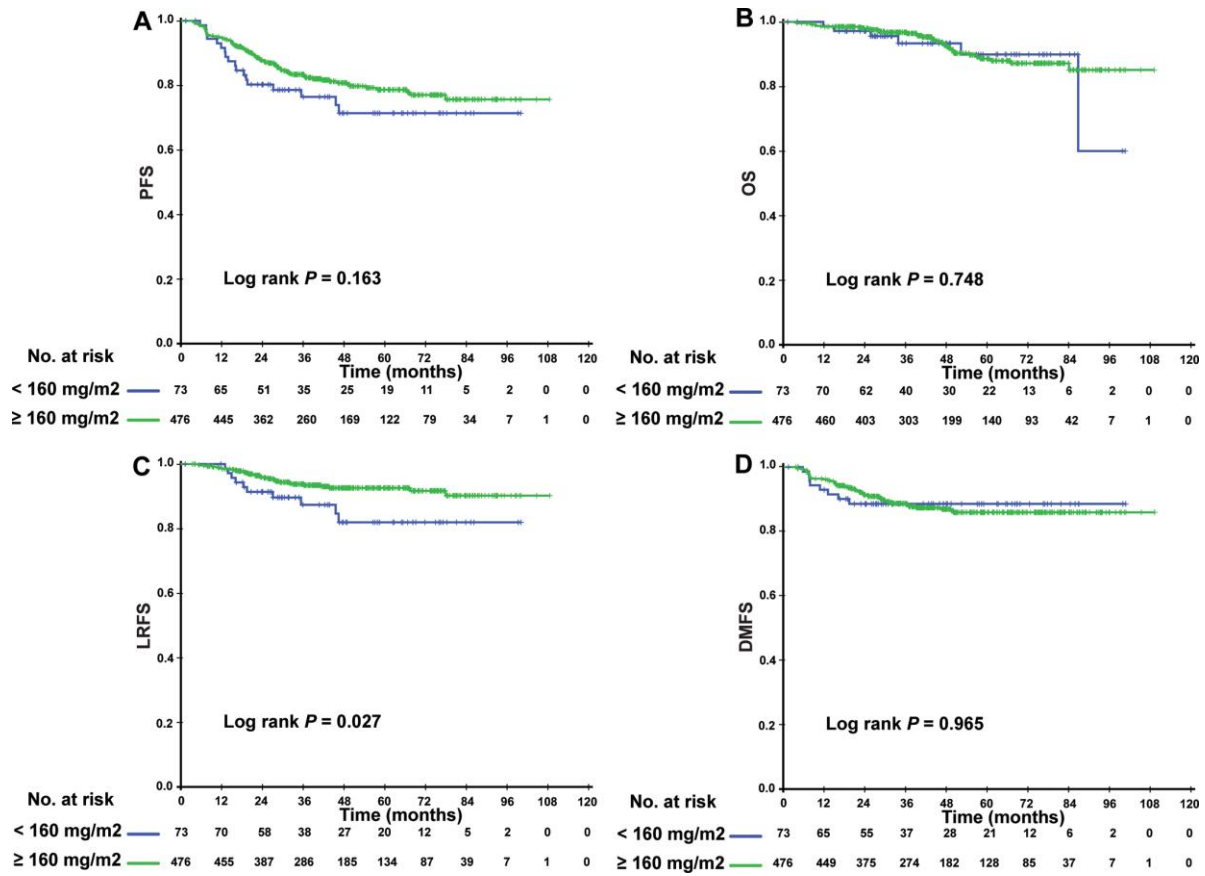

**Supplementary Figure 1.** Kaplan–Meier PFS (A), OS (B), LRFS (C), and DMFS (D) curves for 549 NPC patients stratified by CCD < 160 mg/m<sup>2</sup>, and CCD ≥ 160 mg/m<sup>2</sup>. Abbreviations: PFS = progression-free survival; OS = overall survival; LRFS = local-regional relapse-free survival; DMFS = distant metastasis-free survival; NPC, nasopharyngeal carcinoma; CCD = cumulative cisplatin dose.
