# Supplementary material for: Optimal cumulative cisplatin dose in nasopharyngeal carcinoma patients based on plasma Epstein–Barr virus DNA level after induction chemotherapy
Source: publisher site journal article supplement (doi:10.18632/aging.102920), 2020-03-27
Supplement: Supplementary file [file aging-v12i6-102920-supplementary-material-SD2.pdf]

## SUPPLEMENTARY TABLE

**Supplementary Table 1. Grade 1–4 acute toxicities due to CCRT between the different CCD groups.**

| Adverse event<br>(toxicity grade) | CCD < 160 (n=73) |          |          |        | CCD ≥ 160 (n=476) |           |           |         | p value<br>for<br>events<br>grade ≥ 1 |
|-----------------------------------|------------------|----------|----------|--------|-------------------|-----------|-----------|---------|---------------------------------------|
|                                   | 1(%)             | 2(%)     | 3 (%)    | 4(%)   | 1(%)              | 2(%)      | 3 (%)     | 4(%)    |                                       |
| Leucocytopenia                    | 17(23.3)         | 30(41.1) | 14(19.2) | 0(0.0) | 99(20.8)          | 206(43.3) | 100(21.0) | 7(1.5)  | 0.491                                 |
| Neutropenia                       | 21(28.8)         | 19(26.0) | 9(26.0)  | 1(1.4) | 142(29.8)         | 134(28.2) | 44(9.2)   | 15(2.2) | 0.688                                 |
| Anemia                            | 35(47.9)         | 21(28.8) | 0(0.0)   | 1(1.4) | 213(44.7)         | 145(30.5) | 30(6.3)   | 8(1.7)  | 0.284                                 |
| Thrombocytopenia                  | 10(13.7)         | 3(4.1)   | 4(5.5)   | 1(1.4) | 61(12.8)          | 38(8.0)   | 12(2.5)   | 3(0.6)  | 0.895                                 |
| AST increase                      | 5(6.8)           | 3(4.1)   | 1(1.4)   | 0(0.0) | 37(7.8)           | 4(0.8)    | 1(0.2)    | 1(0.2)  | 0.371                                 |
| ALT increase                      | 8(11.0)          | 1(1.4)   | 3(4.1)   | 0(0.0) | 114(23.9)         | 10(2.1)   | 2(0.4)    | 1(0.2)  | 0.061                                 |
| BUN increase                      | 21(28.8)         | 0(0.0)   | 0(0.0)   | 0(0.0) | 201(42.2)         | 3(0.6)    | 0(0.0)    | 1(0.2)  | 0.021                                 |
| Creatinine<br>increase            | 11(15.1)         | 1(1.4)   | 0(0.0)   | 0(0.0) | 114(23.9)         | 2(0.4)    | 1(0.1)    | 0(0.0)  | 0.127                                 |

Abbreviations: CCRT = concurrent chemoradiotherapy; CCD = cumulative cisplatin dose; ALT = alanine aminotransferase; AST = aspartate aminotransferase; BUN = blood urea nitrogen.

P values were calculated by Chi-square test.
